# Supplementary material for: Spexin2 Is a Novel Food Regulator in Gallus gallus
Source: MDPI journal article supplement (doi:10.3390/ijms24054821), 2023-03-02
Supplement: s1 [file s1]

## Supplemental Table

**Table S1** Primers used in this study

| Gene                                                    | GenBank No.  | Sense/antisense | Primer sequence (5'- to 3'-) | Size (bp) |
|---------------------------------------------------------|--------------|-----------------|------------------------------|-----------|
| Primers for cloning the coding sequence of <i>cSPX2</i> |              |                 |                              |           |
| <i>SPX2</i>                                             | KF601213     | Sense           | GGACAGAAGTCGTGGGAGAAT        | 308       |
|                                                         |              | Antisense       | TCAACAGAGACATAGCTATAGG       |           |
| Primers for 5'-RACE and 3'-RACE PCR                     |              |                 |                              |           |
| <i>SPX2-L1</i>                                          | KF601213     | Antisense       | CAAGCTTAACCTGGAGGACTTCAGTGC  |           |
| <i>SPX2-L2</i>                                          |              | Antisense       | CTATGGTTTACCCTTTGGAGCACACCCG |           |
| <i>SPX2-U1</i>                                          |              | Sense           | CCTTATAGTTGAAATCGGGTGTGCTCCA |           |
| <i>SPX2-U1</i>                                          |              | Sense           | CAAGCTTAACCTGGAGGACTTCAGTGCA |           |
| Primers for quantitative real-time PCR assay            |              |                 |                              |           |
| <i>SPX2</i>                                             | KF601213     | Sense           | AATCGGGTGTGCTCCAAAGG         | 90        |
|                                                         |              | Antisense       | TATCTCCTGCCATAGCGTCC         |           |
| <i>NPY</i>                                              | NM_205473    | Sense           | AGCCCAGAGACACTGATCTCAG       | 184       |
|                                                         |              | Antisense       | TGCATGCACTGGGAATGACGCT       |           |
| <i>AGRP</i>                                             | NM_001398243 | Sense           | GGAACCGCAGGCATTGTC           | 163       |
|                                                         |              | Antisense       | GTAGCAGAAGGCGTTGAAGAA        |           |
| <i>CART</i>                                             | KC249966     | Sense           | CGTCCCGAGAGAAGGAGCTGATC      | 123       |
|                                                         |              | Antisense       | ACTGCTCTCCGGCGTCGCACAT       |           |
| <i>PMCH</i>                                             | NM_001195795 | Sense           | AGAGGAGCGATGCCTTTGCT         | 310       |
|                                                         |              | Antisense       | CTCTTCCCAGCATACATCTGAG       |           |
| <i>POMC</i>                                             | NM_001398117 | Sense           | CTGGGGCTGCTGCTGTGTCA         | 207       |
|                                                         |              | Antisense       | GAAATGGCTCATCACGTACT         |           |
| <i>β-actin</i>                                          | NM_205518    | Sense           | GTCACCAACTGGGATGATAT         | 188       |
|                                                         |              | Antisense       | GCCTGGATGGCTACATACAT         |           |
